# Supplementary material for: Internal field engineering of WO3 by ion channel migration with enhanced photocatalytic oxygen evolution ability
Source: Royal Society of Chemistry journal article supplement (doi:10.1039/d0ta09759d), 2020-12-10
Supplement: d0ta09759d1.pdf [file d0ta09759d1.pdf]

Supporting Information

# Internal Field Engineering of $\text{WO}_3$ by ion channel migration with Enhanced Photocatalytic Oxygen Evolution Ability

*Fang F. Wang*<sup>a\*</sup>, *Chang D.Chen*<sup>a</sup>, *Wei Wang*<sup>b</sup>, *Ming L Kang*<sup>a</sup>, *Ying Gao*<sup>a</sup>, *Xue B. Chen*<sup>a</sup>, *Jing Zhang*<sup>a\*</sup>

<sup>a</sup> College of Chemistry, Chemical Engineering and Environmental Engineering,

Liaoning Shihua University, Fushun 113001, Liaoning, China

<sup>b</sup> College of Chemistry and Chemical Engineering, Jinggangshan University, Ji'an,

Jiangxi 343009, China.

\*To whom correspondence should be addressed.

E-mail: [fionawang@xmu.edu.cn](mailto:fionawang@xmu.edu.cn), [jingzhang\\_dicp@live.cn](mailto:jingzhang_dicp@live.cn) Tel.: +86-24-56863390

### **Sample Preparation for pristine m- WO<sub>3</sub>, T-Na<sub>5</sub>W<sub>14</sub>O<sub>44</sub> and T-Na<sub>2</sub>W<sub>4</sub>O<sub>13</sub>**

- Pristine m-WO<sub>3</sub> was prepared by thermal decomposition method. The white APT powder was calcined at 500°C for 4hours in a static atmosphere of air, and then was rapidly cooled to room temperature.
- Pristine T-Na<sub>5</sub>W<sub>14</sub>O<sub>44</sub> and T-Na<sub>2</sub>W<sub>4</sub>O<sub>13</sub> was prepared using a hydrothermal method. In a typical procedure, 9.8955g Na<sub>2</sub>WO<sub>4</sub>·2H<sub>2</sub>O was dissolved in 30ml deionized water. Then, 3mol/L HCl was slowly dropped into the solution with vigorous stirring, until the pH of the mixture was adjusted to 3.0. Finally, the transparent solution was transferred into a 100ml Teflon-lined stainless steel autoclave, and sealed, heated in an oven at 160 °C for 3h. The obtained white powder was washed five times with distilled water, and dried in a vacuum oven at 60 °C for 24h, which then calcined at 400°C and 500°C for two hours to get the pristine T-Na<sub>5</sub>W<sub>14</sub>O<sub>44</sub> and T-Na<sub>2</sub>W<sub>4</sub>O<sub>13</sub>, respectively.

- **Apparent Quantum efficiency (AQE) calculation**

The apparent quantum efficiency (AQE) of Na/WO<sub>3</sub>-500° for solar water oxidation was evaluated by calculating the percentage of energy conversion of incident photon. The AQE measurement for O<sub>2</sub> evolution is carried out according to a standard experimental procedure. The reaction solution containing the photocatalyst and sacrificial agent was irradiated by monochromatic light ( $\lambda=420$  nm). The incident light intensity was tested to be 29.00 mW·cm<sup>-2</sup> using a PL-MW2000 light power meter (Beijing Perfectlight Technology Co, LTD.) and the light irradiation area was 19.63 cm<sup>2</sup>. The hole consumption rate can be calculated based on the evolution rate of

O<sub>2</sub> in the initial one hour irradiation, which was 41.9 μmol·h<sup>-1</sup>. Therefore, the AQE

can be estimated according to the following equation:

$$\begin{aligned}
 AQE(\%) &= \frac{\text{hole consumption rate}}{\text{incident photon rate}} \times 100\% \\
 &= \frac{4 \times O_2 \text{ generating rate}}{\text{incident photo rate}} \times 100\% \\
 &= \frac{4 \times 6.02 \times 10^{23} \times 41.9 \times 10^{-6}}{29.00 \times 10^{-3} \times 19.63 \times 420 \times 3600 \times 10^{-9} / 6.626 \times 10^{-34} \times 3 \times 10^8} \\
 &= 2.33\%
 \end{aligned}$$

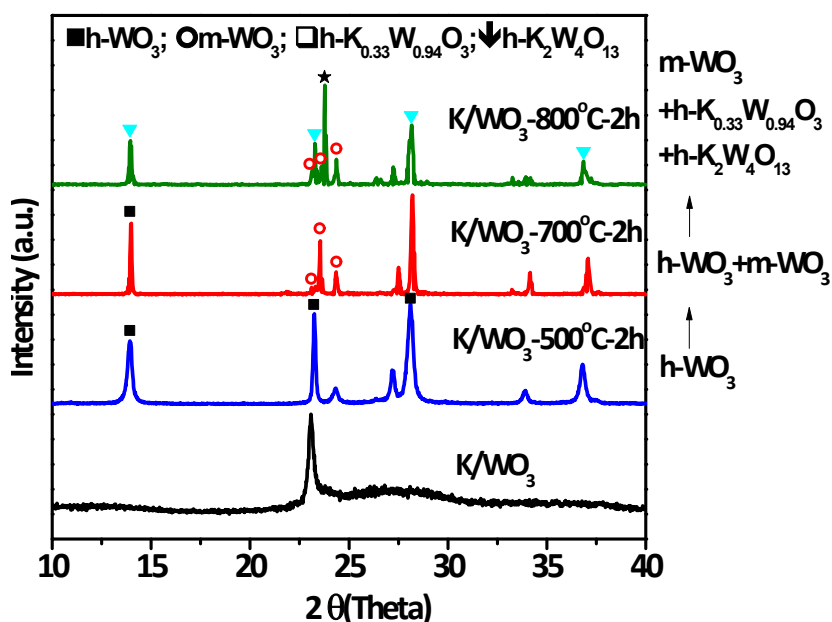

Figure S1 XRD patterns of different samples prepared by calcination of K/WO<sub>3</sub> at different temperatures, where ■ = hexagonal, ○ = monoclinic WO<sub>3</sub>, ▼ Hexagonal K<sub>0.33</sub>W<sub>0.94</sub>O<sub>3</sub>, ★ = Hexagonal K<sub>2</sub>W<sub>4</sub>O<sub>13</sub> crystal structure.

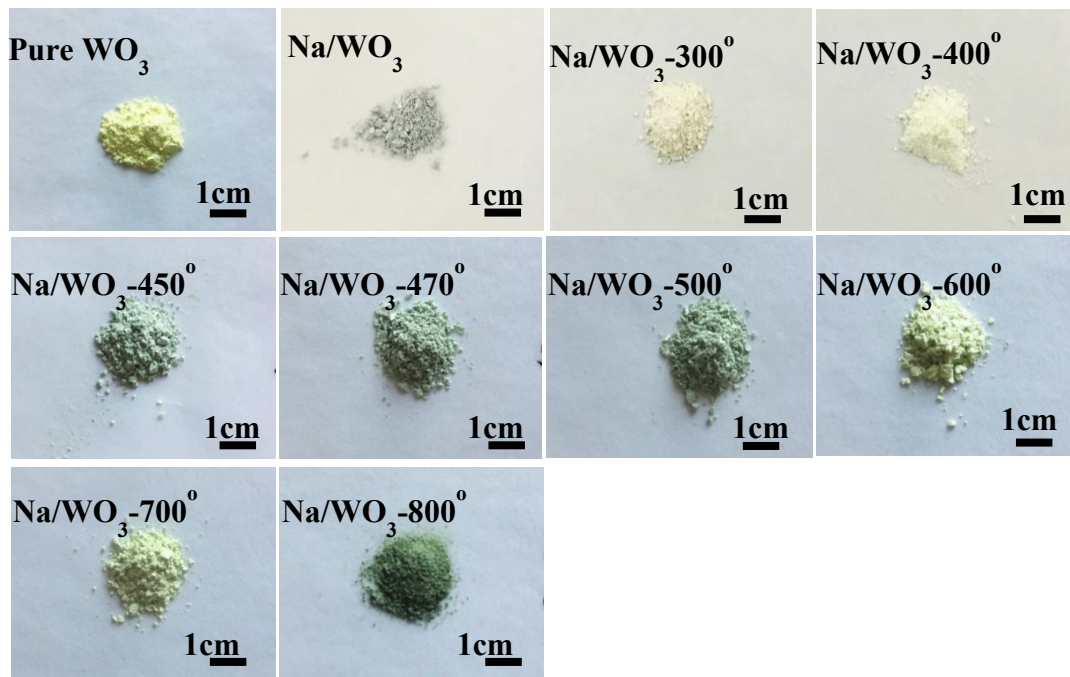

Figure S2 Sample pictures of pure  $\text{WO}_3$ ,  $\text{Na/WO}_3$ , and  $\text{Na/WO}_3\text{-T}$ .

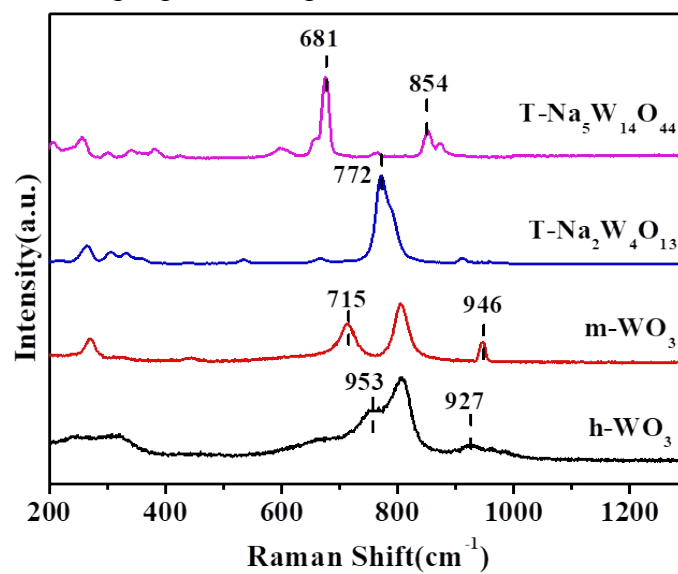

Figure S3 Vis-Raman spectra (Laser line 532nm) of pure phases:  $\text{h-WO}_3$ ,  $\text{m-WO}_3$ ,  $\text{T-Na}_5\text{W}_{14}\text{O}_{44}$  and  $\text{T-Na}_2\text{W}_4\text{O}_{13}$

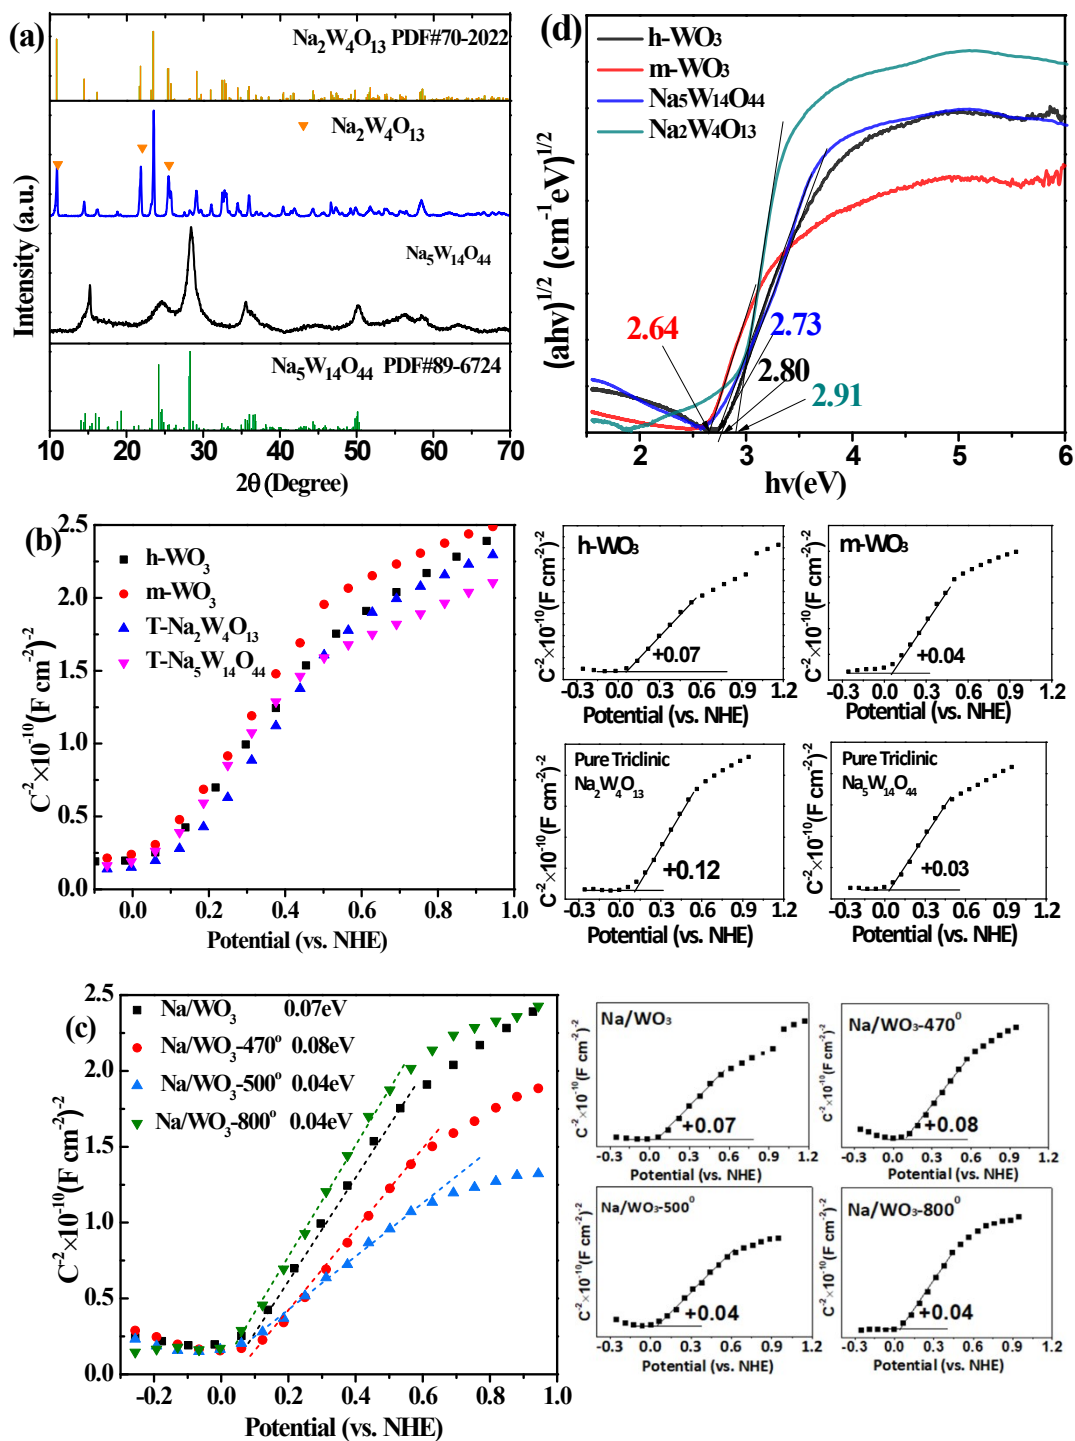

Figure S4 (a) XRD of prepared T- $\text{Na}_5\text{W}_{14}\text{O}_{44}$  and T- $\text{Na}_2\text{W}_4\text{O}_{13}$  using the modified solid state synthesis method in sample preparation section. (b) Mott-Schottky curves of  $\text{h-WO}_3$ ,  $\text{m-WO}_3$ , pure T- $\text{Na}_2\text{W}_4\text{O}_{13}$  and pure T- $\text{Na}_5\text{W}_{14}\text{O}_{44}$ , The extrapolation of the  $C^2$  vs.  $E$  curves on the  $x$  intercepts give the  $E_{\text{FB}}$  of +0.07eV(vs. NHE) for  $\text{h-WO}_3$ , +0.04eV for  $\text{m-WO}_3$ , +0.12 eV for T- $\text{Na}_2\text{W}_4\text{O}_{13}$ , and +0.03 eV for T- $\text{Na}_5\text{W}_{14}\text{O}_{44}$ ,

respectively. (c) Mott-Schottky curves of Na/WO<sub>3</sub> (h-WO<sub>3</sub>) and Na/WO<sub>3</sub>-T, measured in Na<sub>2</sub>SO<sub>4</sub> solution (0.5M, pH ca. 7.0). (d) Tauc plot of the h-WO<sub>3</sub>, m-WO<sub>3</sub>, Pure T-Na<sub>5</sub>W<sub>14</sub>O<sub>44</sub> and Pure T-Na<sub>2</sub>W<sub>4</sub>O<sub>13</sub>.

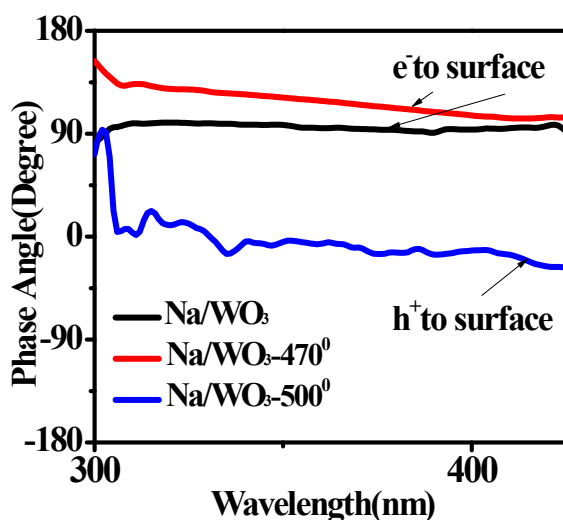

Figure S5 Phase angle curves of Na/WO<sub>3</sub>-T. Signal in the first or fourth quadrant (-90° ~+90°) means photoinduced holes transferred to the surface of photocatalysts under the irradiation, in second or third quadrant (+90° ~+180°, -90° ~-180°) photoinduced electrons transferred to surface.

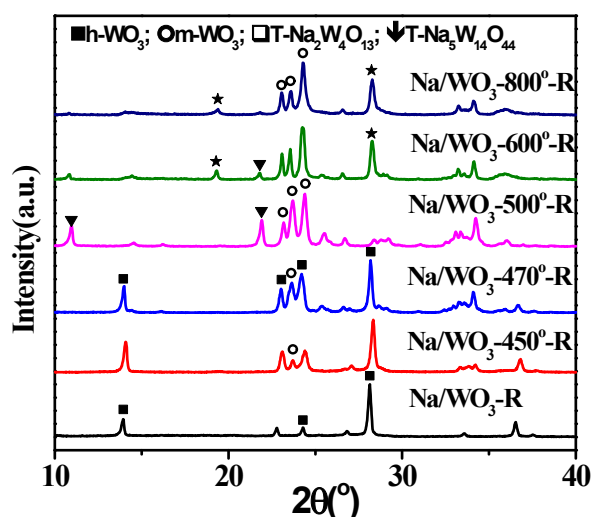

Figure S6 XRD of the photocatalysts after 4 hours' photocatalytic reactions.

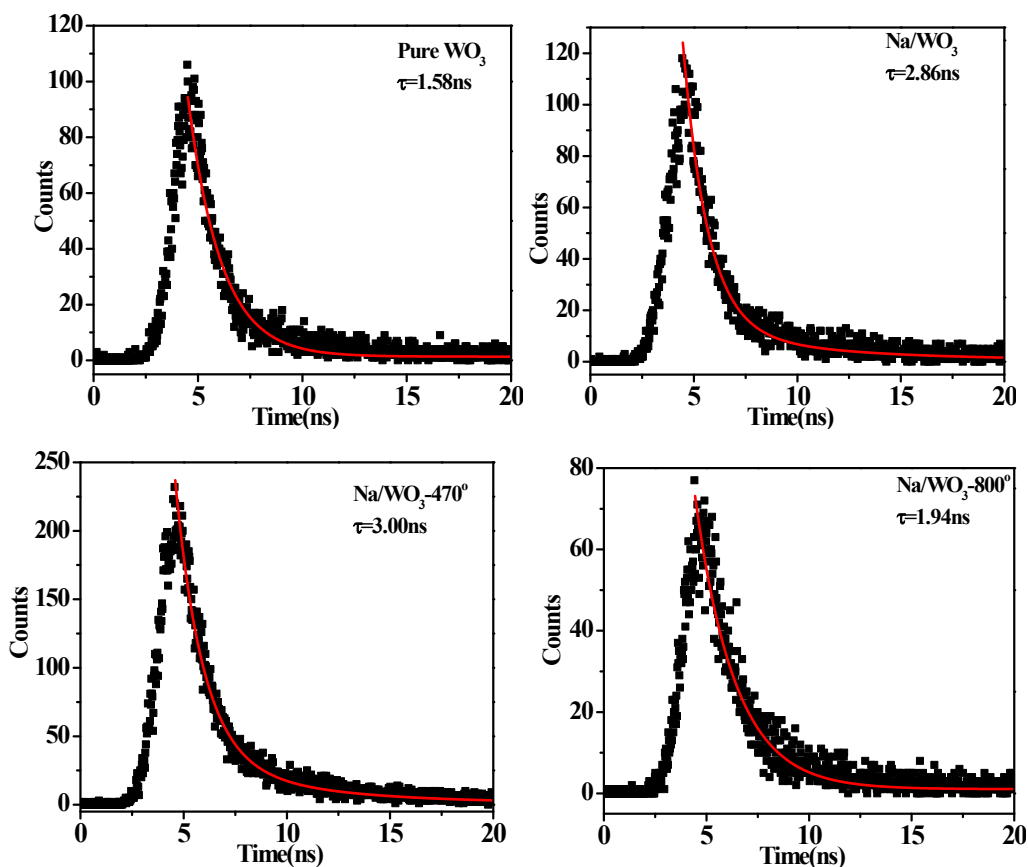

Figure S7 Time-resolved photoluminescence spectroscopy for Pure WO<sub>3</sub>, Na/WO<sub>3</sub>, Na/WO<sub>3</sub>-470°, and Na/WO<sub>3</sub>-800°.

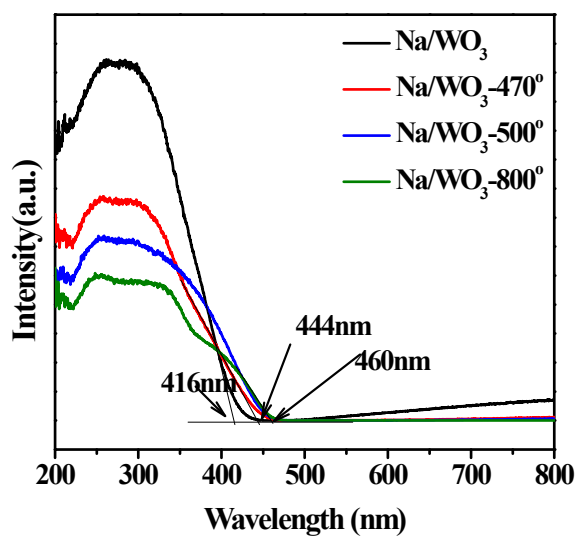

Figure S8 UV-vis DRS of Na/WO<sub>3</sub> and Na/WO<sub>3</sub>-T and their absorption edges.
